# Supplementary material for: TLR7/8-agonist loaded M1 Macrophagederived nanovesicles promote the polarization of macrophages to enhance bladder cancer immunotherapy
Source: Research Square preprint supplement (doi:10.21203/rs.3.rs-934184/v2), 2022-09-27
Supplement: Supplementary file 1 [file b39628e326a855f70b7b9d68.docx]

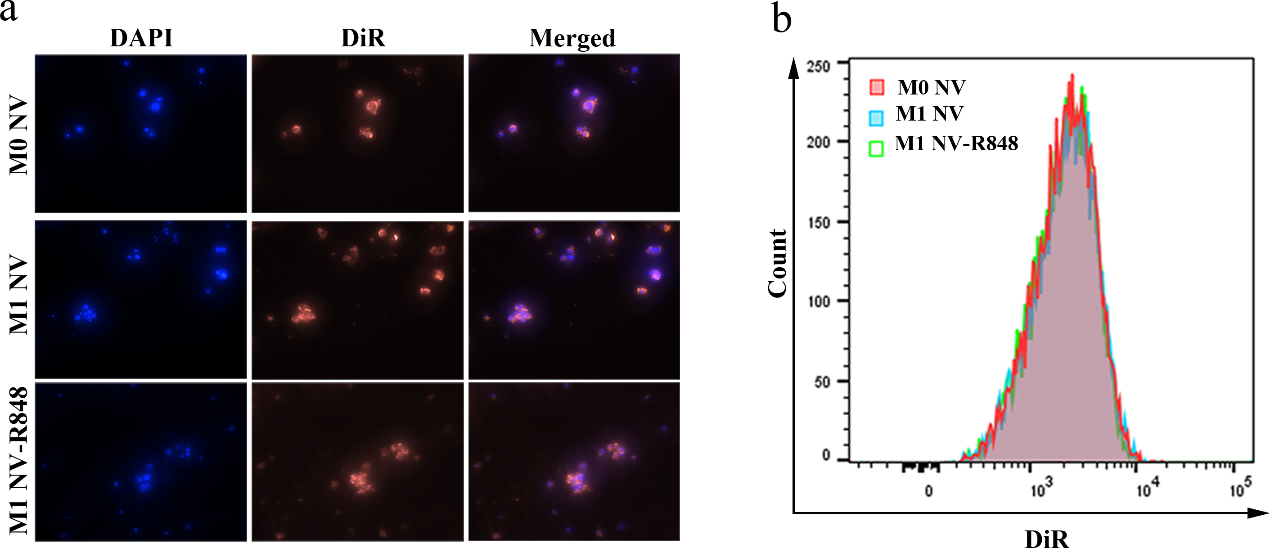


Figure S1. Cellular uptake of NVs by M2 macrophages. (a) The fluorescent image of DiR labelled M0 NV, M1 NV or M1 NV-R848 uptaken by M2 macrophages after 4 h incubation. (b) The cellular uptake of DiR labelled M0 NV, M1 NV or M1 NV-R848 by M2 macrophages detected by flow cytometry after 4 h incubation.


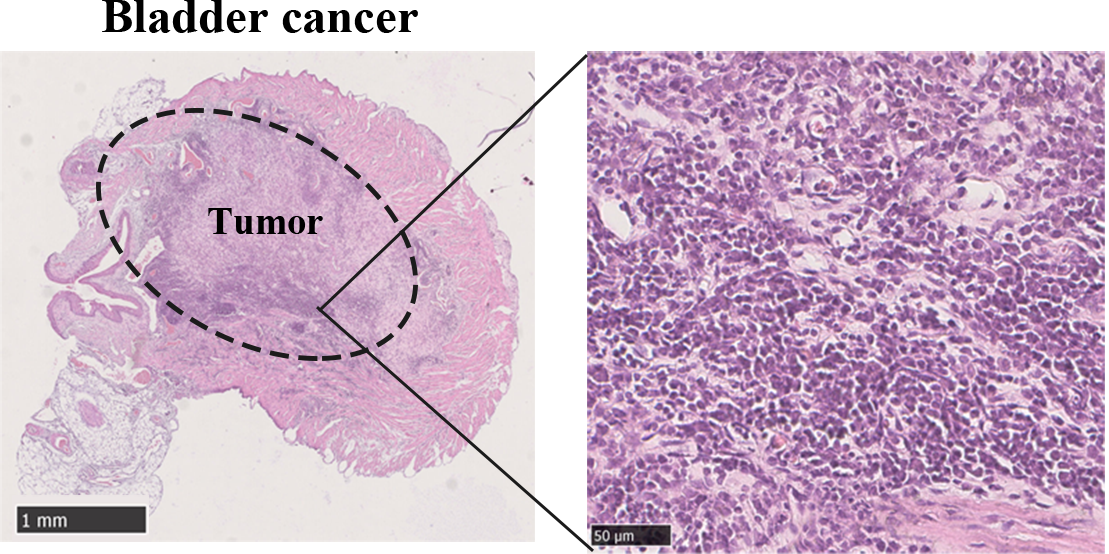


Figure S2. The HE images of orthotopic bladder cancer bearing model. HE images confirmed the tumor (the dotted circle) in the bladder wall.
